# Supplementary material for: In silico repositioning of approved drugs against Schistosoma mansoni energy metabolism targets
Source: PubMed Central journal article supplement (PMC6312253; doi:10.1371/journal.pone.0203340), 2018-12-31
Supplement: pone.0203340.s004.pdf [file pone.0203340.s004.pdf]

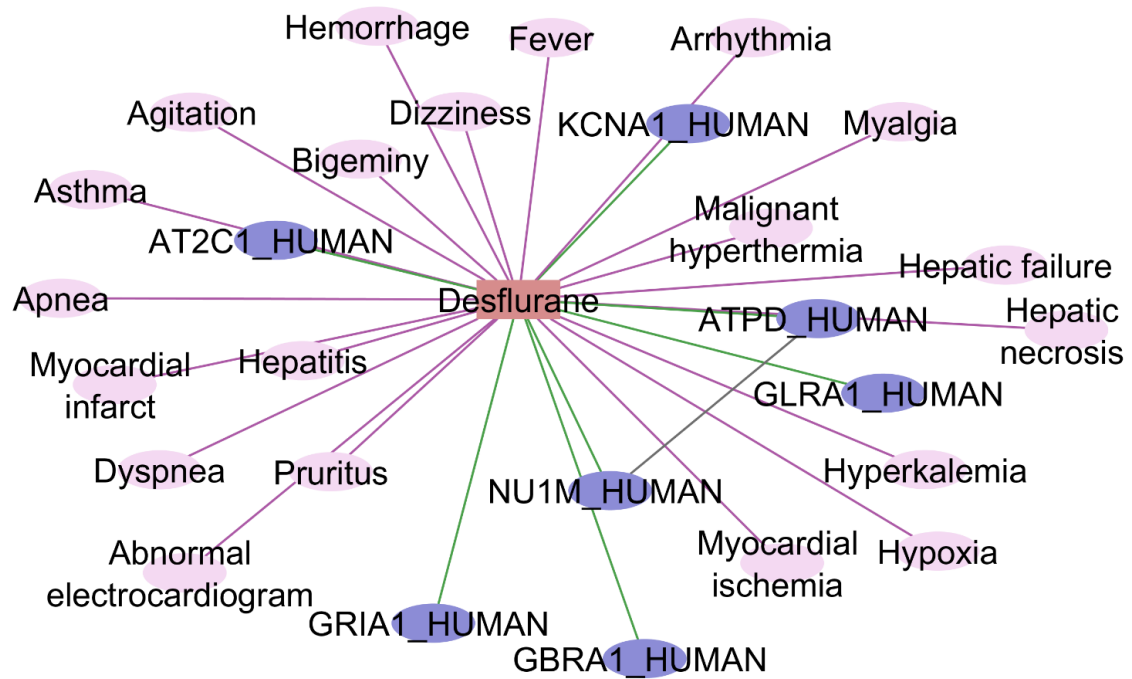

**S4 Figure.** Network of interaction between desflurane and protein targets active in the metabolism of the human body, as well as the relationship with side effects.
