# Supplementary material for: In silico repositioning of approved drugs against Schistosoma mansoni energy metabolism targets
Source: PubMed Central journal article supplement (PMC6312253; doi:10.1371/journal.pone.0203340), 2018-12-31
Supplement: pone.0203340.s006.pdf [file pone.0203340.s006.pdf]

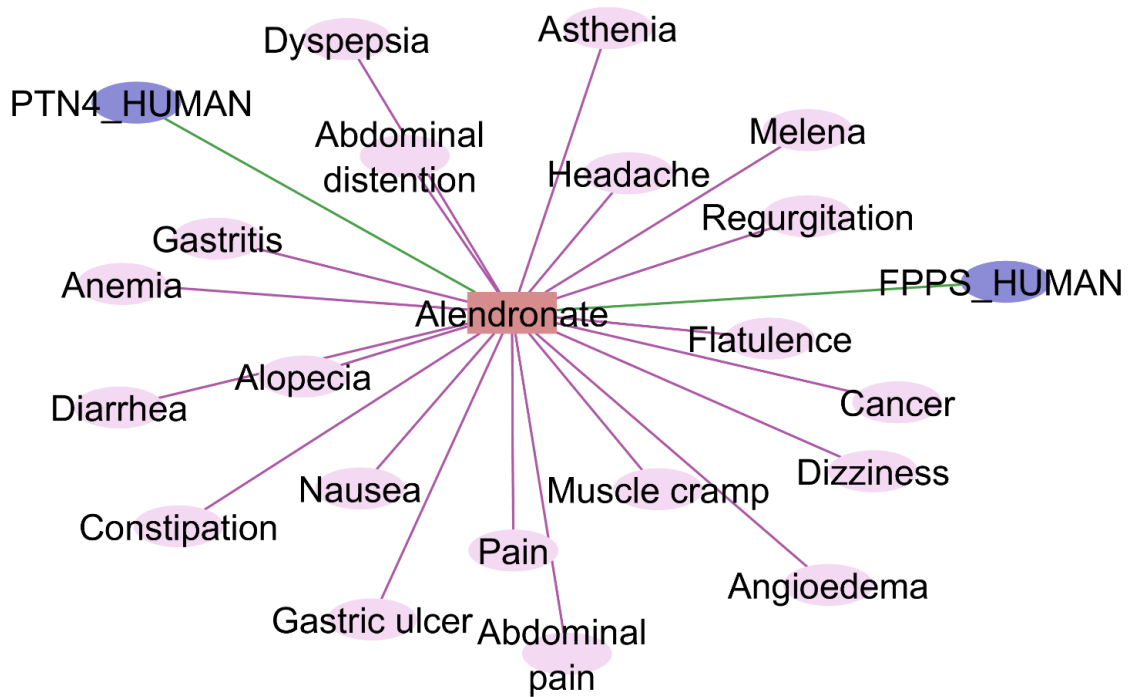

**S6 Figure.** Network of interactions between Alendronate and protein targets active in the metabolism of the human body, as well as the relationship with the side effects
